# Supplementary material for: Urethane Formation with an Excess of Isocyanate or Alcohol: Experimental and Ab Initio Study
Source: PubMed Central journal article supplement (PMC6835639; doi:10.3390/polym11101543), 2019-09-22
Supplement: polymers-11-01543-s001.pdf [file polymers-11-01543-s001.pdf]

**Supporting Information**
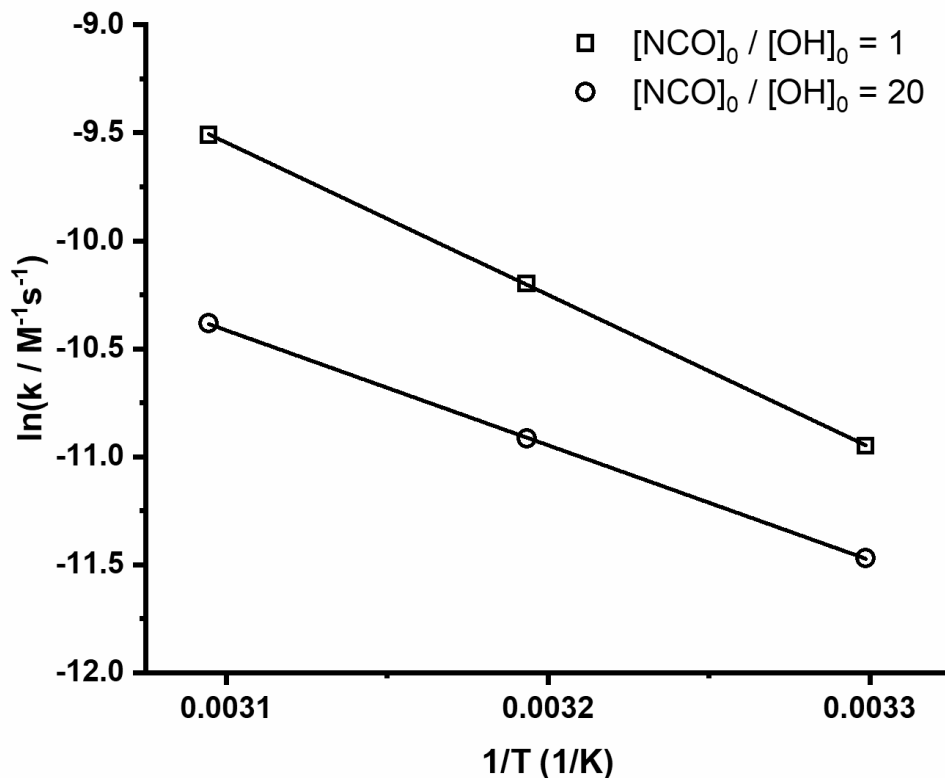

**Figure S1.** Arrhenius plots for the urethane formation in the reaction condition of the stoichiometric and isocyanate excess over 303–323 K.

**Table S1.** Calculated SMD solvated B3LYP/6-31G(2df,p) geometries in Cartesian coordinates of the stationary points for the reaction system studied. The calculated G4MP2(SMD=PrOH) thermochemical properties at T=298.15 K and P=1 atm is given in Hartree.

| Species | G4MP2 results ( $E_0$ ,<br>H(T), G(T,P))  | Symbols | Atomic<br>Number | Coordinates (Angstroms) |           |           |
|---------|-------------------------------------------|---------|------------------|-------------------------|-----------|-----------|
|         |                                           |         |                  | X                       | Y         | Z         |
| PrOH    | -194.063935<br>-194.057346<br>-194.091806 | C       | 6                | -2.909361               | -0.665201 | 0.165039  |
|         |                                           | H       | 1                | -2.683684               | -1.718392 | 0.395247  |
|         |                                           | H       | 1                | -2.834971               | -0.102905 | 1.109171  |
|         |                                           | O       | 8                | -1.992133               | -0.152946 | -0.800301 |
|         |                                           | H       | 1                | -1.104473               | -0.232548 | -0.433004 |
|         |                                           | C       | 6                | -4.318200               | -0.548058 | -0.398087 |
|         |                                           | H       | 1                | -4.363109               | -1.098766 | -1.346149 |
|         |                                           | H       | 1                | -4.513986               | 0.505211  | -0.635608 |
|         |                                           | C       | 6                | -5.379676               | -1.075698 | 0.567957  |
|         |                                           | H       | 1                | -6.383150               | -0.978051 | 0.141314  |
| PhNCO   | -399.180454<br>-399.172345<br>-399.212909 | C       | 6                | 1.363993                | -0.453906 | 1.008670  |
|         |                                           | O       | 8                | 1.904422                | -1.463649 | 1.271945  |
|         |                                           | N       | 7                | 0.712696                | 0.498113  | 0.677208  |

|       |             |   |   |           |           |           |
|-------|-------------|---|---|-----------|-----------|-----------|
|       |             | C | 6 | 0.707561  | 1.893029  | 0.747436  |
|       |             | C | 6 | -0.358843 | 2.582332  | 0.166917  |
|       |             | C | 6 | 1.740074  | 2.593490  | 1.381367  |
|       |             | C | 6 | -0.391063 | 3.972739  | 0.222270  |
|       |             | H | 1 | -1.149703 | 2.023300  | -0.320265 |
|       |             | C | 6 | 1.695932  | 3.982440  | 1.429775  |
|       |             | H | 1 | 2.562957  | 2.046030  | 1.828564  |
|       |             | C | 6 | 0.633089  | 4.677307  | 0.852143  |
|       |             | H | 1 | -1.221500 | 4.504693  | -0.230168 |
|       |             | H | 1 | 2.497557  | 4.523187  | 1.922307  |
|       |             | H | 1 | 0.604502  | 5.760921  | 0.893367  |
|       |             | O | 8 | -1.333516 | -0.176214 | 0.628705  |
|       |             | H | 1 | -1.075373 | 0.325058  | -0.168265 |
|       |             | C | 6 | -2.589551 | 0.332829  | 1.060820  |
|       |             | H | 1 | -2.522688 | 1.410621  | 1.282040  |
|       |             | H | 1 | -2.819483 | -0.172336 | 2.007771  |
|       |             | C | 6 | -3.710872 | 0.084220  | 0.052601  |
|       |             | H | 1 | -3.447691 | 0.579050  | -0.891626 |
|       |             | H | 1 | -3.759185 | -0.991808 | -0.157905 |
|       |             | C | 6 | -5.068367 | 0.588020  | 0.546207  |
|       |             | H | 1 | -5.046383 | 1.666263  | 0.743892  |
|       |             | H | 1 | -5.853298 | 0.403498  | -0.194651 |
|       |             | H | 1 | -5.364684 | 0.087059  | 1.475380  |
| PrOH  | -388.132251 | O | 8 | -0.585639 | 1.445589  | -1.549899 |
| dimer | -388.118752 | H | 1 | -0.008010 | 0.927510  | -2.125033 |
|       | -388.172969 | C | 6 | 0.171865  | 2.558356  | -1.052456 |
|       |             | H | 1 | -0.539557 | 3.163688  | -0.480466 |
|       |             | H | 1 | 0.525151  | 3.169551  | -1.894722 |
|       |             | C | 6 | 1.340934  | 2.131549  | -0.171348 |
|       |             | H | 1 | 2.016506  | 1.497965  | -0.761697 |
|       |             | H | 1 | 0.951723  | 1.509242  | 0.643117  |
|       |             | C | 6 | 2.109333  | 3.328999  | 0.391183  |
|       |             | H | 1 | 2.944515  | 3.000723  | 1.018074  |
|       |             | H | 1 | 2.520543  | 3.951942  | -0.411629 |
|       |             | H | 1 | 1.461382  | 3.964425  | 1.006086  |
|       |             | H | 8 | -2.897174 | 2.480931  | 1.298884  |
|       |             | C | 6 | -3.085696 | 1.395122  | 0.890758  |
|       |             | N | 7 | -3.416003 | 0.319057  | 0.474667  |
|       |             | C | 6 | -2.881243 | -0.907868 | 0.075327  |
|       |             | C | 6 | -3.759099 | -1.905265 | -0.353667 |
|       |             | C | 6 | -3.255237 | -3.138367 | -0.757417 |
|       |             | C | 6 | -1.883062 | -3.380598 | -0.735633 |
| PhNCO | -798.363714 | C | 6 | -1.011492 | -2.379723 | -0.305890 |
| dimer | -798.345862 | C | 6 | -1.502009 | -1.143576 | 0.100259  |
|       | -798.41869  | H | 1 | -4.824463 | -1.704739 | -0.366355 |
|       |             | H | 1 | -3.940670 | -3.910888 | -1.090165 |
|       |             | H | 1 | -1.494103 | -4.342734 | -1.051483 |
|       |             | H | 1 | 0.058640  | -2.558353 | -0.285646 |
|       |             | H | 1 | -0.829567 | -0.361093 | 0.435467  |
|       |             | O | 8 | 3.057360  | 4.329848  | -1.626033 |
|       |             | C | 6 | 2.875225  | 3.411473  | -0.916291 |
|       |             | N | 7 | 2.624868  | 2.564325  | -0.103445 |

|      |             |   |   |           |           |           |
|------|-------------|---|---|-----------|-----------|-----------|
|      |             | C | 6 | 2.786341  | 1.196469  | 0.126054  |
|      |             | C | 6 | 2.285082  | 0.659672  | 1.314036  |
|      |             | C | 6 | 2.432917  | -0.700895 | 1.570971  |
|      |             | C | 6 | 3.076950  | -1.526607 | 0.650314  |
|      |             | C | 6 | 3.574911  | -0.983254 | -0.534584 |
|      |             | C | 6 | 3.433961  | 0.373825  | -0.802623 |
|      |             | H | 1 | 1.789925  | 1.312483  | 2.023994  |
|      |             | H | 1 | 2.045384  | -1.113448 | 2.496594  |
|      |             | H | 1 | 3.194517  | -2.585200 | 0.855957  |
|      |             | H | 1 | 4.078412  | -1.618449 | -1.256098 |
|      |             | H | 1 |           | 3.819387  | 0.803114  |
|      |             |   |   |           |           | -         |
|      |             |   |   |           | 1.721254  |           |
|      |             | O | 8 | -0.934415 | -0.173206 | -2.180401 |
|      |             | C | 6 | 0.019218  | -0.678599 | -1.703657 |
|      |             | N | 7 | 1.022207  | -1.229275 | -1.362012 |
|      |             | C | 6 | 1.813931  | -1.610693 | -0.278436 |
|      |             | C | 6 | 2.971553  | -2.348717 | -0.532715 |
|      |             | C | 6 | 3.780868  | -2.742412 | 0.528832  |
|      |             | C | 6 | 3.440725  | -2.402734 | 1.836991  |
|      |             | C | 6 | 2.282985  | -1.663864 | 2.081025  |
|      |             | C | 6 | 1.462963  | -1.263761 | 1.031036  |
|      |             | H | 1 | 3.224521  | -2.605877 | -1.555036 |
|      |             | H | 1 | 4.679936  | -3.316204 | 0.329507  |
|      |             | H | 1 | 4.073882  | -2.711000 | 2.662186  |
|      |             | H | 1 | 2.012965  | -1.395207 | 3.097244  |
|      |             | H | 1 | 0.562038  | -0.685849 | 1.208052  |
|      |             | O | 8 | -1.358009 | 0.747123  | 1.077827  |
|      |             | H | 1 | -1.387062 | 1.440447  | 0.389647  |
|      |             | C | 6 | -2.692497 | 0.465385  | 1.484824  |
|      |             | H | 1 | -3.164650 | 1.366836  | 1.907830  |
|      |             | H | 1 | -2.618469 | -0.268158 | 2.297360  |
|      |             | C | 6 | -3.562138 | -0.090351 | 0.358214  |
|      |             | H | 1 | -3.609421 | 0.651333  | -0.449695 |
|      |             | H | 1 | -3.073746 | -0.980325 | -0.058225 |
|      |             | C | 6 | -4.976155 | -0.436531 | 0.829275  |
|      |             | H | 1 | -5.491005 | 0.444940  | 1.229231  |
|      |             | H | 1 | -5.582310 | -0.828705 | 0.006046  |
|      |             | H | 1 | -4.957908 | -1.196542 | 1.619371  |
|      |             | O | 8 | -1.378460 | 2.559499  | -1.059024 |
|      |             | H | 1 | -1.224271 | 1.885180  | -1.735627 |
|      |             | C | 6 | -0.323615 | 3.527022  | -1.137168 |
|      |             | H | 1 | -0.566024 | 4.288281  | -0.387606 |
|      |             | H | 1 | -0.343023 | 4.014654  | -2.122192 |
|      |             | C | 6 | 1.054521  | 2.932109  | -0.866026 |
|      |             | H | 1 | 1.254938  | 2.146129  | -1.606574 |
|      |             | H | 1 | 1.043025  | 2.447454  | 0.118060  |
|      |             | C | 6 | 2.160764  | 3.988092  | -0.919846 |
|      |             | H | 1 | 3.140262  | 3.540693  | -0.723100 |
|      |             | H | 1 | 2.206365  | 4.469060  | -1.903833 |
|      |             | H | 1 | 1.997756  | 4.773753  | -0.172917 |
|      |             | O | 8 | 0.365314  | -2.202092 | -1.127278 |
|      |             | C | 6 | 0.179391  | -1.145284 | -0.595824 |
| A_RC | -787.319160 |   |   |           |           |           |
|      | -787.296413 |   |   |           |           |           |
|      | -787.376306 |   |   |           |           |           |
| ATS  | -787.299226 |   |   |           |           |           |
|      | -787.278659 |   |   |           |           |           |

|      |             |   |   |           |           |           |
|------|-------------|---|---|-----------|-----------|-----------|
|      | -787.351062 | N | 7 | -0.634665 | -0.361355 | -0.008655 |
|      |             | C | 6 | -1.986291 | -0.728631 | 0.167018  |
|      |             | C | 6 | -2.800360 | 0.188946  | 0.848174  |
|      |             | C | 6 | -4.146863 | -0.077924 | 1.068771  |
|      |             | C | 6 | -4.713507 | -1.267848 | 0.613289  |
|      |             | C | 6 | -3.912038 | -2.184467 | -0.064958 |
|      |             | C | 6 | -2.562218 | -1.925794 | -0.289645 |
|      |             | H | 1 | -2.358279 | 1.115571  | 1.200487  |
|      |             | H | 1 | -4.755142 | 0.648697  | 1.598707  |
|      |             | H | 1 | -5.764199 | -1.477475 | 0.784209  |
|      |             | H | 1 | -4.338817 | -3.115466 | -0.426041 |
|      |             | H | 1 | -1.955382 | -2.650020 | -0.818310 |
|      |             | O | 8 | 1.645743  | -0.236563 | -0.667581 |
|      |             | H | 1 | 1.603733  | 0.524586  | -0.003996 |
|      |             | C | 6 | 2.885286  | -0.981326 | -0.581902 |
|      |             | H | 1 | 3.667988  | -0.312016 | -0.952694 |
|      |             | H | 1 | 2.776695  | -1.810160 | -1.284282 |
|      |             | C | 6 | 3.180140  | -1.469855 | 0.828463  |
|      |             | H | 1 | 3.193421  | -0.610223 | 1.509288  |
|      |             | H | 1 | 2.366874  | -2.128215 | 1.155958  |
|      |             | C | 6 | 4.515687  | -2.214001 | 0.893336  |
|      |             | H | 1 | 5.347490  | -1.567350 | 0.591838  |
|      |             | H | 1 | 4.715657  | -2.562360 | 1.911250  |
|      |             | H | 1 | 4.516406  | -3.089625 | 0.234347  |
|      |             | O | 8 | 1.071421  | 1.592944  | 1.066818  |
|      |             | H | 1 | 0.199053  | 1.169394  | 0.919067  |
|      |             | C | 6 | 0.998633  | 2.984575  | 0.719796  |
|      |             | H | 1 | 1.992563  | 3.395007  | 0.927752  |
|      |             | H | 1 | 0.287324  | 3.482985  | 1.391944  |
|      |             | C | 6 | 0.613771  | 3.225012  | -0.736432 |
|      |             | H | 1 | -0.367201 | 2.771737  | -0.926225 |
|      |             | H | 1 | 1.331799  | 2.708463  | -1.385221 |
|      |             | C | 6 | 0.574134  | 4.716065  | -1.077893 |
|      |             | H | 1 | 0.293274  | 4.870783  | -2.124498 |
|      |             | H | 1 | -0.154550 | 5.248471  | -0.455745 |
|      |             | H | 1 | 1.551598  | 5.187289  | -0.922497 |
|      |             | O | 8 | -0.077916 | -2.336124 | 0.810103  |
|      |             | C | 6 | -0.243619 | -1.202580 | 0.391877  |
|      |             | N | 7 | 0.713885  | -0.343142 | -0.049179 |
|      |             | C | 6 | 2.096937  | -0.569335 | -0.154325 |
|      |             | C | 6 | 2.863684  | 0.453194  | -0.735345 |
|      |             | C | 6 | 4.238436  | 0.310372  | -0.874887 |
|      |             | C | 6 | 4.877912  | -0.850519 | -0.441130 |
| A_PC | -787.350669 | C | 6 | 4.116809  | -1.863620 | 0.135965  |
|      | -787.329532 | C | 6 | 2.737157  | -1.736024 | 0.285186  |
|      | -787.403904 | H | 1 | 2.366976  | 1.355443  | -1.076105 |
|      |             | H | 1 | 4.811209  | 1.113690  | -1.327758 |
|      |             | H | 1 | 5.951268  | -0.962224 | -0.551464 |
|      |             | H | 1 | 4.597851  | -2.773872 | 0.480938  |
|      |             | H | 1 | 2.160749  | -2.529258 | 0.736358  |
|      |             | O | 8 | -1.454167 | -0.600386 | 0.303651  |
|      |             | H | 1 | -0.571509 | 2.253442  | -1.830345 |

|      |             |   |   |           |           |           |
|------|-------------|---|---|-----------|-----------|-----------|
|      |             | C | 6 | -2.601288 | -1.385060 | 0.699087  |
|      |             | H | 1 | -3.346380 | -0.644546 | 1.001308  |
|      |             | H | 1 | -2.336263 | -1.994346 | 1.566797  |
|      |             | C | 6 | -3.118285 | -2.245030 | -0.446947 |
|      |             | H | 1 | -3.316687 | -1.599902 | -1.311152 |
|      |             | H | 1 | -2.335773 | -2.952183 | -0.743422 |
|      |             | C | 6 | -4.387555 | -3.002411 | -0.050891 |
|      |             | H | 1 | -5.191930 | -2.313421 | 0.231361  |
|      |             | H | 1 | -4.750227 | -3.615344 | -0.881966 |
|      |             | H | 1 | -4.204756 | -3.668705 | 0.799830  |
|      |             | O | 8 | -0.015711 | 2.313234  | -1.043186 |
|      |             | H | 1 | 0.378555  | 0.567934  | -0.371738 |
|      |             | C | 6 | -0.518475 | 3.371282  | -0.217158 |
|      |             | H | 1 | -0.448522 | 4.326362  | -0.757092 |
|      |             | H | 1 | 0.164427  | 3.423812  | 0.637569  |
|      |             | C | 6 | -1.947816 | 3.128814  | 0.253729  |
|      |             | H | 1 | -1.987313 | 2.165537  | 0.775365  |
|      |             | H | 1 | -2.600504 | 3.041893  | -0.625443 |
|      |             | C | 6 | -2.452406 | 4.248241  | 1.167026  |
|      |             | H | 1 | -3.480950 | 4.058020  | 1.489830  |
|      |             | H | 1 | -1.832268 | 4.337114  | 2.066493  |
|      |             | H | 1 | -2.438057 | 5.217827  | 0.655851  |
|      |             | O | 8 | -4.065707 | 0.984144  | -1.715563 |
|      |             | C | 6 | -3.133986 | 1.542174  | -1.266971 |
|      |             | N | 7 | -2.288288 | 2.203497  | -0.728741 |
|      |             | C | 6 | -0.904684 | 2.387968  | -0.708738 |
|      |             | C | 6 | -0.352323 | 3.145606  | 0.326681  |
|      |             | C | 6 | 1.024375  | 3.348494  | 0.373934  |
|      |             | C | 6 | 1.851438  | 2.804684  | -0.607387 |
|      |             | C | 6 | 1.293068  | 2.055026  | -1.643178 |
|      |             | C | 6 | -0.080412 | 1.843118  | -1.700836 |
|      |             | H | 1 | -1.005307 | 3.564115  | 1.084192  |
|      |             | H | 1 | 1.448714  | 3.935594  | 1.181781  |
|      |             | H | 1 | 2.923405  | 2.966113  | -0.568419 |
|      |             | H | 1 | 1.929158  | 1.629513  | -2.412463 |
|      |             | H | 1 | -0.519972 | 1.258611  | -2.501349 |
|      | -992.440669 | O | 8 | 0.259581  | 0.588093  | 2.769787  |
| I_RC | -992.415771 | C | 6 | 0.619882  | -0.060363 | 1.861913  |
|      | -992.501672 | N | 7 | 0.855076  | -0.729073 | 0.887539  |
|      |             | C | 6 | 1.947178  | -1.359078 | 0.273186  |
|      |             | C | 6 | 1.750324  | -1.947799 | -0.977223 |
|      |             | C | 6 | 2.815113  | -2.581642 | -1.611314 |
|      |             | C | 6 | 4.069080  | -2.631563 | -1.005638 |
|      |             | C | 6 | 4.256622  | -2.041492 | 0.244425  |
|      |             | C | 6 | 3.201987  | -1.404622 | 0.889527  |
|      |             | H | 1 | 0.770150  | -1.899338 | -1.437373 |
|      |             | H | 1 | 2.660007  | -3.037874 | -2.583498 |
|      |             | H | 1 | 4.895994  | -3.126910 | -1.503135 |
|      |             | H | 1 | 5.229787  | -2.075759 | 0.723242  |
|      |             | H | 1 | 3.341088  | -0.944570 | 1.862192  |
|      |             | O | 8 | -1.704670 | -1.065946 | -0.932010 |
|      |             | H | 1 | -1.032670 | -0.868251 | -0.264611 |

|      |             |   |   |           |           |           |
|------|-------------|---|---|-----------|-----------|-----------|
|      |             | C | 6 | -2.540079 | -2.104733 | -0.416762 |
|      |             | H | 1 | -1.945961 | -3.011407 | -0.225782 |
|      |             | H | 1 | -3.248467 | -2.342104 | -1.218759 |
|      |             | C | 6 | -3.291223 | -1.697386 | 0.847777  |
|      |             | H | 1 | -2.560882 | -1.405255 | 1.614775  |
|      |             | H | 1 | -3.896536 | -0.809228 | 0.629183  |
|      |             | C | 6 | -4.182700 | -2.821622 | 1.380254  |
|      |             | H | 1 | -3.595485 | -3.713079 | 1.629796  |
|      |             | H | 1 | -4.713011 | -2.509185 | 2.285629  |
|      |             | H | 1 | -4.935133 | -3.116341 | 0.639433  |
|      |             | O | 8 | 1.776222  | 2.455064  | -0.611020 |
|      |             | C | 6 | 1.183822  | 1.397392  | -0.646079 |
|      |             | N | 7 | 1.433103  | 0.126469  | -0.532859 |
|      |             | C | 6 | 2.741287  | -0.294615 | -0.224237 |
|      |             | C | 6 | 3.217055  | -1.463750 | -0.835721 |
|      |             | C | 6 | 4.482143  | -1.960088 | -0.535530 |
|      |             | C | 6 | 5.297589  | -1.302604 | 0.384056  |
|      |             | C | 6 | 4.830406  | -0.142346 | 1.001122  |
|      |             | C | 6 | 3.566191  | 0.359033  | 0.706015  |
|      |             | H | 1 | 2.583729  | -1.971324 | -1.555301 |
|      |             | H | 1 | 4.831028  | -2.864359 | -1.024903 |
|      |             | H | 1 | 6.283928  | -1.689373 | 0.618455  |
|      |             | H | 1 | 5.453798  | 0.377626  | 1.722440  |
|      |             | H | 1 | 3.211544  | 1.258068  | 1.196185  |
|      |             | O | 8 | 0.517790  | -2.302854 | 0.394672  |
|      |             | C | 6 | -0.180462 | -1.441726 | 0.033994  |
|      |             | N | 7 | -1.168021 | -0.743407 | -0.273090 |
|      |             | C | 6 | -2.513609 | -1.198284 | -0.114568 |
|      |             | C | 6 | -3.520418 | -0.419051 | -0.686302 |
|      | -992.40818  | C | 6 | -4.850761 | -0.807948 | -0.557071 |
| ITS1 | -992.386459 | C | 6 | -5.181142 | -1.969238 | 0.138293  |
|      | -992.461264 | C | 6 | -4.169725 | -2.742860 | 0.706139  |
|      |             | C | 6 | -2.836086 | -2.364028 | 0.584998  |
|      |             | H | 1 | -3.257140 | 0.477969  | -1.236048 |
|      |             | H | 1 | -5.629053 | -0.198677 | -1.004762 |
|      |             | H | 1 | -6.218561 | -2.270062 | 0.237494  |
|      |             | H | 1 | -4.416343 | -3.648652 | 1.250416  |
|      |             | H | 1 | -2.055105 | -2.968320 | 1.033862  |
|      |             | O | 8 | -0.293267 | 1.519610  | -0.982472 |
|      |             | H | 1 | -0.783632 | 0.611498  | -0.708893 |
|      |             | C | 6 | -0.990124 | 2.755101  | -0.620560 |
|      |             | H | 1 | -1.913251 | 2.729678  | -1.203413 |
|      |             | H | 1 | -0.356244 | 3.561210  | -0.989435 |
|      |             | C | 6 | -1.248993 | 2.861927  | 0.872633  |
|      |             | H | 1 | -1.835297 | 1.996845  | 1.202559  |
|      |             | H | 1 | -0.292065 | 2.832650  | 1.405277  |
|      |             | C | 6 | -1.993984 | 4.158152  | 1.202915  |
|      |             | H | 1 | -2.962243 | 4.202475  | 0.692030  |
|      |             | H | 1 | -2.179438 | 4.230789  | 2.278687  |
|      |             | H | 1 | -1.414278 | 5.037823  | 0.902181  |
|      |             | O | 8 | 2.238080  | 1.758652  | -0.282565 |
| I_IM | -992.485662 | C | 6 | 1.147127  | 1.229651  | -0.280325 |
|      | -992.464198 |   |   |           |           |           |

|      |             |   |   |           |           |           |
|------|-------------|---|---|-----------|-----------|-----------|
|      | -992.539141 | N | 7 | 0.989360  | -0.146063 | -0.114643 |
|      |             | C | 6 | 2.235319  | -0.880880 | 0.003073  |
|      |             | C | 6 | 2.891077  | -1.308889 | -1.146861 |
|      |             | C | 6 | 4.090459  | -2.007539 | -1.031479 |
|      |             | C | 6 | 4.625671  | -2.275141 | 0.227700  |
|      |             | C | 6 | 3.960572  | -1.842479 | 1.373875  |
|      |             | C | 6 | 2.761469  | -1.142113 | 1.264146  |
|      |             | H | 1 | 2.463042  | -1.094351 | -2.120189 |
|      |             | H | 1 | 4.605105  | -2.342545 | -1.925958 |
|      |             | H | 1 | 5.559888  | -2.820000 | 0.315626  |
|      |             | H | 1 | 4.374252  | -2.048379 | 2.355546  |
|      |             | H | 1 | 2.234656  | -0.798627 | 2.147891  |
|      |             | O | 8 | -0.036175 | -2.173830 | 0.005599  |
|      |             | C | 6 | -0.184512 | -0.962706 | -0.062116 |
|      |             | N | 7 | -1.381618 | -0.327717 | -0.074724 |
|      |             | C | 6 | -2.668528 | -0.901573 | -0.036650 |
|      |             | C | 6 | -3.747135 | -0.006362 | -0.099994 |
|      |             | C | 6 | -5.054751 | -0.472790 | -0.065884 |
|      |             | C | 6 | -5.313804 | -1.839491 | 0.031540  |
|      |             | C | 6 | -4.243290 | -2.726971 | 0.094870  |
|      |             | C | 6 | -2.925179 | -2.274966 | 0.062396  |
|      |             | H | 1 | -3.551997 | 1.059464  | -0.175998 |
|      |             | H | 1 | -5.873504 | 0.237922  | -0.116106 |
|      |             | H | 1 | -6.334708 | -2.205056 | 0.057972  |
|      |             | H | 1 | -4.427052 | -3.794169 | 0.171751  |
|      |             | H | 1 | -2.105783 | -2.974505 | 0.113587  |
|      |             | O | 8 | -0.005576 | 1.887736  | -0.447283 |
|      |             | H | 1 | -1.353655 | 0.681629  | -0.140521 |
|      |             | C | 6 | 0.067187  | 3.333839  | -0.604147 |
|      |             | H | 1 | -0.837095 | 3.580301  | -1.164673 |
|      |             | H | 1 | 0.943448  | 3.569275  | -1.210932 |
|      |             | C | 6 | 0.100578  | 4.039085  | 0.742472  |
|      |             | H | 1 | -0.766875 | 3.720557  | 1.332193  |
|      |             | H | 1 | 0.998067  | 3.728741  | 1.288278  |
|      |             | C | 6 | 0.091552  | 5.559697  | 0.568655  |
|      |             | H | 1 | -0.806816 | 5.895720  | 0.038548  |
|      |             | H | 1 | 0.111456  | 6.059129  | 1.542076  |
|      |             | H | 1 | 0.963909  | 5.900923  | 0.000139  |
|      |             | O | 8 | 3.070396  | -0.185858 | -0.061767 |
|      |             | C | 6 | 1.905931  | -0.447960 | 0.093516  |
|      |             | N | 7 | 0.848508  | 0.510860  | -0.109783 |
|      |             | C | 6 | 1.263503  | 1.898232  | -0.193443 |
|      |             | C | 6 | 1.798204  | 2.530467  | 0.927467  |
|      |             | C | 6 | 2.149922  | 3.874315  | 0.842295  |
|      | -992.412657 | C | 6 | 1.967003  | 4.573850  | -0.350364 |
| ITS2 | -992.391214 | C | 6 | 1.430158  | 3.929508  | -1.462810 |
|      | -992.465658 | C | 6 | 1.074436  | 2.584501  | -1.388039 |
|      |             | H | 1 | 1.932074  | 1.977823  | 1.850226  |
|      |             | H | 1 | 2.567878  | 4.374301  | 1.709494  |
|      |             | H | 1 | 2.243809  | 5.621076  | -0.411892 |
|      |             | H | 1 | 1.287471  | 4.470154  | -2.392297 |
|      |             | H | 1 | 0.657972  | 2.070218  | -2.247471 |

|      |             |   |   |           |           |           |
|------|-------------|---|---|-----------|-----------|-----------|
|      |             | O | 8 | -0.556358 | 0.449776  | 1.926254  |
|      |             | C | 6 | -0.491581 | 0.275933  | 0.734240  |
|      |             | N | 7 | -1.243784 | -0.061514 | -0.299764 |
|      |             | C | 6 | -2.605134 | -0.390298 | -0.262663 |
|      |             | C | 6 | -3.216147 | -0.724929 | -1.479750 |
|      |             | C | 6 | -4.564452 | -1.060185 | -1.523992 |
|      |             | C | 6 | -5.327801 | -1.068514 | -0.356758 |
|      |             | C | 6 | -4.723819 | -0.737172 | 0.855133  |
|      |             | C | 6 | -3.374419 | -0.399444 | 0.912040  |
|      |             | H | 1 | -2.617315 | -0.716613 | -2.384705 |
|      |             | H | 1 | -5.020141 | -1.315783 | -2.475566 |
|      |             | H | 1 | -6.380117 | -1.330071 | -0.391355 |
|      |             | H | 1 | -5.307161 | -0.739877 | 1.770878  |
|      |             | H | 1 | -2.914550 | -0.143180 | 1.857868  |
|      |             | O | 8 | 1.378212  | -1.611396 | 0.429887  |
|      |             | H | 1 | -0.025564 | 0.154559  | -0.915533 |
|      |             | C | 6 | 2.294946  | -2.731542 | 0.616013  |
|      |             | H | 1 | 1.768879  | -3.384629 | 1.314847  |
|      |             | H | 1 | 3.205786  | -2.355602 | 1.087045  |
|      |             | C | 6 | 2.579205  | -3.431399 | -0.703284 |
|      |             | H | 1 | 1.627093  | -3.725722 | -1.159358 |
|      |             | H | 1 | 3.064695  | -2.726148 | -1.386878 |
|      |             | C | 6 | 3.469474  | -4.658858 | -0.495707 |
|      |             | H | 1 | 2.995393  | -5.387002 | 0.172039  |
|      |             | H | 1 | 3.665639  | -5.157949 | -1.449487 |
|      |             | H | 1 | 4.435089  | -4.381557 | -0.058324 |
|      |             | O | 8 | -3.157751 | 1.281544  | 0.041121  |
|      |             | C | 6 | -2.205433 | 0.634874  | -0.356711 |
|      |             | N | 7 | -0.939237 | 1.096361  | -0.563406 |
|      |             | C | 6 | -0.439721 | 2.398948  | -0.393218 |
|      |             | C | 6 | -1.171418 | 3.444674  | 0.183463  |
|      |             | C | 6 | -0.583798 | 4.700938  | 0.318453  |
|      |             | C | 6 | 0.720693  | 4.937991  | -0.107231 |
|      |             | C | 6 | 1.446127  | 3.893797  | -0.679549 |
|      |             | C | 6 | 0.873946  | 2.635790  | -0.824100 |
|      |             | H | 1 | -2.182702 | 3.273490  | 0.520425  |
|      |             | H | 1 | -1.161918 | 5.502584  | 0.767650  |
|      |             | H | 1 | 1.166296  | 5.920567  | 0.004710  |
|      | -992.467862 | H | 1 | 2.464131  | 4.055812  | -1.019358 |
| I_PC | -992.444786 | H | 1 | 1.439665  | 1.826070  | -1.275114 |
|      | -992.525723 | O | 8 | -0.653844 | -3.421242 | -0.525894 |
|      |             | C | 6 | 0.199927  | -2.678962 | -0.210559 |
|      |             | N | 7 | 0.981309  | -1.829500 | 0.124642  |
|      |             | C | 6 | 2.346751  | -1.670522 | 0.385008  |
|      |             | C | 6 | 2.788083  | -0.445869 | 0.889711  |
|      |             | C | 6 | 4.141835  | -0.259117 | 1.155527  |
|      |             | C | 6 | 5.054905  | -1.285310 | 0.921217  |
|      |             | C | 6 | 4.606951  | -2.506420 | 0.416974  |
|      |             | C | 6 | 3.257536  | -2.705843 | 0.146828  |
|      |             | H | 1 | 2.069721  | 0.345249  | 1.070867  |
|      |             | H | 1 | 4.480609  | 0.693957  | 1.548121  |
|      |             | H | 1 | 6.108898  | -1.136074 | 1.129806  |



|  |   |   |           |           |           |
|--|---|---|-----------|-----------|-----------|
|  | H | 1 | 5.310947  | -3.311201 | 0.231847  |
|  | H | 1 | 2.902430  | -3.652291 | -0.246801 |
|  | O | 8 | -2.252090 | -0.677201 | -0.675692 |
|  | H | 1 | -0.285417 | 0.410789  | -0.917277 |
|  | C | 6 | -3.522345 | -1.347393 | -0.504320 |
|  | H | 1 | -3.488521 | -2.175471 | -1.216616 |
|  | H | 1 | -4.325129 | -0.664131 | -0.792442 |
|  | C | 6 | -3.707840 | -1.854103 | 0.919506  |
|  | H | 1 | -2.866416 | -2.508897 | 1.174012  |
|  | H | 1 | -3.678860 | -1.002462 | 1.608224  |
|  | C | 6 | -5.029307 | -2.609973 | 1.074847  |
|  | H | 1 | -5.075362 | -3.475640 | 0.403990  |
|  | H | 1 | -5.149676 | -2.976037 | 2.099226  |
|  | H | 1 | -5.886305 | -1.965647 | 0.847890  |

**Table S2.** Calculated SMD solvated B3LYP/6-31G(2df,p) geometries in Cartesian coordinates of the stationary points for the reaction system studied. The calculated G4MP2(SMD=THF) thermochemical properties at T=298.15K and P=1atm is given in Hartree.

| Species       | G4MP2 Results ( $E_0$ ,<br>H(T), G(T,P))  | Symbols   | Atomic<br>Number | Coordinates (Angstroms) |           |           |
|---------------|-------------------------------------------|-----------|------------------|-------------------------|-----------|-----------|
|               |                                           |           |                  | X                       | Y         | Z         |
| PrOH          | -194.060899<br>-194.054295<br>-194.088799 | C         | 6                | -2.907577               | -0.664746 | 0.163849  |
|               |                                           | H         | 1                | -2.685087               | -1.719296 | 0.395320  |
|               |                                           | H         | 1                | -2.837448               | -0.104684 | 1.110715  |
|               |                                           | O         | 8                | -1.993977               | -0.151616 | -0.800223 |
|               |                                           | H         | 1                | -1.106685               | -0.232240 | -0.433808 |
|               |                                           | C         | 6                | -4.317196               | -0.548280 | -0.398248 |
|               |                                           | H         | 1                | -4.361646               | -1.098591 | -1.346080 |
|               |                                           | H         | 1                | -4.512047               | 0.504598  | -0.636496 |
|               |                                           | C         | 6                | -5.379000               | -1.075387 | 0.568026  |
|               |                                           | H         | 1                | -6.382496               | -0.977963 | 0.141685  |
|               |                                           | H         | 1                | -5.218461               | -2.134866 | 0.799182  |
| H             | 1                                         | -5.366397 | -0.523759        | 1.515260                |           |           |
| PhNCO         | -399.184895<br>-399.176788<br>-399.217348 | C         | 6                | 1.361927                | -0.457303 | 1.007885  |
|               |                                           | O         | 8                | 1.897779                | -1.467634 | 1.270991  |
|               |                                           | N         | 7                | 0.713993                | 0.498649  | 0.675929  |
|               |                                           | C         | 6                | 0.709986                | 1.892343  | 0.747574  |
|               |                                           | C         | 6                | -0.357000               | 2.582052  | 0.167365  |
|               |                                           | C         | 6                | 1.741405                | 2.595410  | 1.381216  |
|               |                                           | C         | 6                | -0.390854               | 3.972161  | 0.222739  |
|               |                                           | H         | 1                | -1.146794               | 2.021374  | -0.319403 |
|               |                                           | C         | 6                | 1.695808                | 3.984255  | 1.429670  |
|               |                                           | H         | 1                | 2.565409                | 2.050170  | 1.828859  |
|               |                                           | C         | 6                | 0.632414                | 4.678123  | 0.852387  |
|               |                                           | H         | 1                | -1.221912               | 4.503149  | -0.229472 |
| H             | 1                                         | 2.496876  | 4.525717         | 1.922112                |           |           |
| H             | 1                                         | 0.602637  | 5.761562         | 0.893680                |           |           |
| PrOH<br>dimer | -388.127484<br>-388.113924<br>-388.168710 | O         | 8                | -1.356571               | -0.110161 | 0.607761  |
|               |                                           | H         | 1                | -1.114418               | 0.375698  | -0.199955 |
|               |                                           | C         | 6                | -2.613096               | 0.381218  | 1.040000  |
|               |                                           | H         | 1                | -2.577298               | 1.468990  | 1.223236  |
|               |                                           | H         | 1                | -2.815730               | -0.093239 | 2.009300  |
| C             | 6                                         | -3.749818 | 0.067412         | 0.065775                |           |           |

|       |             |   |   |           |           |           |
|-------|-------------|---|---|-----------|-----------|-----------|
|       |             | H | 1 | -3.519934 | 0.531595  | -0.902474 |
|       |             | H | 1 | -3.774246 | -1.016349 | -0.103546 |
|       |             | C | 6 | -5.110045 | 0.556207  | 0.567751  |
|       |             | H | 1 | -5.111226 | 1.641256  | 0.725407  |
|       |             | H | 1 | -5.905319 | 0.325523  | -0.148633 |
|       |             | H | 1 | -5.375574 | 0.083944  | 1.520927  |
|       |             | O | 8 | -0.545336 | 1.487540  | -1.606629 |
|       |             | H | 1 | 0.039409  | 0.961529  | -2.166739 |
|       |             | C | 6 | 0.223706  | 2.577628  | -1.078143 |
|       |             | H | 1 | -0.488962 | 3.188729  | -0.514184 |
|       |             | H | 1 | 0.607125  | 3.195882  | -1.902417 |
|       |             | C | 6 | 1.363118  | 2.116785  | -0.175008 |
|       |             | H | 1 | 2.043846  | 1.480339  | -0.756952 |
|       |             | H | 1 | 0.940525  | 1.488776  | 0.617659  |
|       |             | H | 6 | 2.138519  | 3.291190  | 0.425776  |
|       |             | H | 1 | 2.948279  | 2.937694  | 1.071635  |
|       |             | H | 1 | 2.585175  | 3.917087  | -0.355334 |
|       |             | H | 1 | 1.485539  | 3.930506  | 1.030966  |
|       |             | O | 8 | -2.905651 | 2.486196  | 1.314125  |
|       |             | C | 6 | -3.093611 | 1.407377  | 0.892285  |
|       |             | N | 7 | -3.423301 | 0.335584  | 0.460435  |
|       |             | C | 6 | -2.888163 | -0.886911 | 0.051684  |
|       |             | C | 6 | -3.765952 | -1.877390 | -0.394754 |
|       |             | C | 6 | -3.264033 | -3.107634 | -0.808654 |
|       |             | C | 6 | -1.893026 | -3.355600 | -0.780204 |
|       |             | C | 6 | -1.021013 | -2.362785 | -0.333600 |
|       |             | C | 6 | -1.509888 | -1.129413 | 0.082707  |
|       |             | H | 1 | -4.830189 | -1.671879 | -0.412158 |
|       |             | H | 1 | -3.950027 | -3.873687 | -1.154672 |
|       |             | H | 1 | -1.505593 | -4.315578 | -1.103976 |
|       |             | H | 1 | 0.048220  | -2.545178 | -0.307959 |
| PhNCO | -798.37246  | H | 1 | -0.836000 | -0.354011 | 0.430633  |
| dimer | -798.354615 | O | 8 | 2.853919  | 4.265650  | -1.696417 |
|       | -798.428003 | C | 6 | 2.745635  | 3.363124  | -0.954703 |
|       |             | N | 7 | 2.575442  | 2.530237  | -0.105043 |
|       |             | C | 6 | 2.780325  | 1.173004  | 0.144341  |
|       |             | C | 6 | 2.371957  | 0.657408  | 1.377123  |
|       |             | C | 6 | 2.563260  | -0.692747 | 1.657352  |
|       |             | C | 6 | 3.159564  | -1.530967 | 0.716266  |
|       |             | C | 6 | 3.565243  | -1.010159 | -0.512962 |
|       |             | C | 6 | 3.379599  | 0.336568  | -0.804824 |
|       |             | H | 1 | 1.913664  | 1.320713  | 2.101804  |
|       |             | H | 1 | 2.247060  | -1.087701 | 2.617072  |
|       |             | H | 1 | 3.311382  | -2.581413 | 0.939774  |
|       |             | H | 1 | 4.031458  | -1.654957 | -1.250680 |
|       |             | H | 1 | 3.693780  | 0.747407  | -1.758295 |
|       |             | O | 8 | -0.047333 | 0.271049  | -2.409349 |
|       |             | C | 6 | 0.577569  | -0.535794 | -1.814721 |
| A_RC  | -787.318417 | N | 7 | 1.250825  | -1.402293 | -1.351095 |
|       | -787.295744 | C | 6 | 1.741341  | -2.039724 | -0.213048 |
|       | -787.375725 | C | 6 | 2.604098  | -3.124682 | -0.382066 |
|       |             | C | 6 | 3.111586  | -3.776699 | 0.737551  |

|     |             |   |   |           |           |           |
|-----|-------------|---|---|-----------|-----------|-----------|
|     |             | C | 6 | 2.762486  | -3.350697 | 2.017758  |
|     |             | C | 6 | 1.899712  | -2.266028 | 2.174972  |
|     |             | C | 6 | 1.381889  | -1.602885 | 1.066927  |
|     |             | H | 1 | 2.867007  | -3.443308 | -1.384275 |
|     |             | H | 1 | 3.782221  | -4.619285 | 0.606008  |
|     |             | H | 1 | 3.160386  | -3.860623 | 2.888586  |
|     |             | H | 1 | 1.624250  | -1.930659 | 3.169665  |
|     |             | H | 1 | 0.706986  | -0.758823 | 1.175588  |
|     |             | O | 8 | -0.882296 | 0.871162  | 1.184906  |
|     |             | H | 1 | -0.965565 | 1.536296  | 0.476084  |
|     |             | C | 6 | -2.191352 | 0.464541  | 1.552628  |
|     |             | H | 1 | -2.787643 | 1.329561  | 1.887434  |
|     |             | H | 1 | -2.078832 | -0.198128 | 2.420239  |
|     |             | C | 6 | -2.936446 | -0.267159 | 0.435520  |
|     |             | H | 1 | -3.014445 | 0.402314  | -0.430520 |
|     |             | H | 1 | -2.334494 | -1.128012 | 0.117797  |
|     |             | C | 6 | -4.330872 | -0.729079 | 0.864308  |
|     |             | H | 1 | -4.955824 | 0.118783  | 1.168534  |
|     |             | H | 1 | -4.847104 | -1.244171 | 0.047645  |
|     |             | H | 1 | -4.278273 | -1.422009 | 1.712365  |
|     |             | O | 8 | -1.205336 | 2.563650  | -1.015196 |
|     |             | H | 1 | -0.834881 | 1.951573  | -1.666304 |
|     |             | C | 6 | -0.620816 | 3.854320  | -1.214602 |
|     |             | H | 1 | -1.103035 | 4.514354  | -0.485398 |
|     |             | H | 1 | -0.879716 | 4.228002  | -2.216090 |
|     |             | C | 6 | 0.892894  | 3.865429  | -1.022647 |
|     |             | H | 1 | 1.347738  | 3.166512  | -1.736933 |
|     |             | H | 1 | 1.125414  | 3.489528  | -0.018827 |
|     |             | C | 6 | 1.488878  | 5.261996  | -1.214309 |
|     |             | H | 1 | 2.574170  | 5.249052  | -1.073529 |
|     |             | H | 1 | 1.288379  | 5.646392  | -2.220915 |
|     |             | H | 1 | 1.068680  | 5.975525  | -0.496221 |
|     |             | O | 8 | 0.371334  | -2.036814 | -1.034847 |
|     |             | C | 6 | 0.297280  | -0.975923 | -0.461983 |
|     |             | N | 7 | -0.591468 | -0.241268 | 0.156517  |
|     |             | C | 6 | -1.935632 | -0.631645 | 0.246848  |
|     |             | C | 6 | -2.783932 | 0.208140  | 0.990848  |
|     |             | C | 6 | -4.135472 | -0.078925 | 1.136360  |
|     |             | C | 6 | -4.683980 | -1.214749 | 0.541098  |
|     |             | C | 6 | -3.853764 | -2.054172 | -0.198779 |
|     |             | C | 6 | -2.497310 | -1.776316 | -0.349086 |
|     | -787.298818 | H | 1 | -2.361654 | 1.094190  | 1.455182  |
| ATS | -787.278897 | H | 1 | -4.763086 | 0.589570  | 1.718024  |
|     | -787.349561 | H | 1 | -5.739158 | -1.440848 | 0.652644  |
|     |             | H | 1 | -4.263909 | -2.943108 | -0.669290 |
|     |             | H | 1 | -1.866740 | -2.438866 | -0.925228 |
|     |             | O | 8 | 1.615036  | -0.186135 | -0.433852 |
|     |             | H | 1 | 1.531222  | 0.701824  | 0.277743  |
|     |             | C | 6 | 2.855555  | -0.938199 | -0.483124 |
|     |             | H | 1 | 3.605424  | -0.233144 | -0.852322 |
|     |             | H | 1 | 2.704903  | -1.718986 | -1.229595 |
|     |             | C | 6 | 3.235477  | -1.515701 | 0.872206  |

|      |             |   |   |           |           |           |
|------|-------------|---|---|-----------|-----------|-----------|
|      |             | H | 1 | 3.310146  | -0.703863 | 1.605364  |
|      |             | H | 1 | 2.436616  | -2.185060 | 1.211071  |
|      |             | C | 6 | 4.560319  | -2.278910 | 0.796354  |
|      |             | H | 1 | 5.380906  | -1.624753 | 0.480972  |
|      |             | H | 1 | 4.822592  | -2.696002 | 1.773106  |
|      |             | H | 1 | 4.499911  | -3.108464 | 0.083320  |
|      |             | O | 8 | 0.992228  | 1.544560  | 1.084651  |
|      |             | H | 1 | 0.118878  | 1.031751  | 0.885837  |
|      |             | C | 6 | 0.912344  | 2.927449  | 0.677448  |
|      |             | H | 1 | 1.883099  | 3.371795  | 0.919242  |
|      |             | H | 1 | 0.157529  | 3.412981  | 1.306703  |
|      |             | C | 6 | 0.583088  | 3.111857  | -0.800293 |
|      |             | H | 1 | -0.369992 | 2.617677  | -1.021839 |
|      |             | H | 1 | 1.348059  | 2.612788  | -1.407208 |
|      |             | C | 6 | 0.505149  | 4.593448  | -1.175870 |
|      |             | H | 1 | 0.268135  | 4.713608  | -2.237304 |
|      |             | H | 1 | -0.271340 | 5.109890  | -0.600423 |
|      |             | H | 1 | 1.456117  | 5.104420  | -0.986809 |
|      |             | O | 8 | -0.064994 | -2.360283 | 0.781102  |
|      |             | C | 6 | -0.229145 | -1.221280 | 0.391323  |
|      |             | N | 7 | 0.728595  | -0.356768 | -0.054135 |
|      |             | C | 6 | 2.109034  | -0.587439 | -0.168936 |
|      |             | C | 6 | 2.891894  | 0.463291  | -0.674183 |
|      |             | C | 6 | 4.265334  | 0.311716  | -0.818085 |
|      |             | C | 6 | 4.888185  | -0.884409 | -0.463617 |
|      |             | C | 6 | 4.110960  | -1.925232 | 0.037924  |
|      |             | C | 6 | 2.732512  | -1.790985 | 0.189366  |
|      |             | H | 1 | 2.408588  | 1.394591  | -0.949824 |
|      |             | H | 1 | 4.850894  | 1.137233  | -1.210717 |
|      |             | H | 1 | 5.960581  | -1.001892 | -0.576517 |
|      |             | H | 1 | 4.578812  | -2.863693 | 0.319710  |
|      |             | H | 1 | 2.137948  | -2.603148 | 0.579223  |
|      |             | O | 8 | -1.435044 | -0.600611 | 0.340791  |
|      |             | H | 1 | -0.331555 | 2.436314  | -1.802095 |
|      | -787.348309 | C | 6 | -2.576442 | -1.384863 | 0.741758  |
| A_PC | -787.327214 | H | 1 | -3.298274 | -0.653648 | 1.116314  |
|      | -787.401497 | H | 1 | -2.285470 | -2.047561 | 1.560365  |
|      |             | C | 6 | -3.156347 | -2.176121 | -0.424134 |
|      |             | H | 1 | -3.385561 | -1.484885 | -1.243825 |
|      |             | H | 1 | -2.395600 | -2.873252 | -0.792031 |
|      |             | C | 6 | -4.415170 | -2.943114 | -0.012794 |
|      |             | H | 1 | -5.199163 | -2.264113 | 0.341899  |
|      |             | H | 1 | -4.821574 | -3.507993 | -0.857416 |
|      |             | H | 1 | -4.201897 | -3.655193 | 0.792400  |
|      |             | O | 8 | 0.122638  | 2.390497  | -0.951555 |
|      |             | H | 1 | 0.398374  | 0.563280  | -0.347044 |
|      |             | C | 6 | -0.466384 | 3.366054  | -0.081346 |
|      |             | H | 1 | -0.268706 | 4.376129  | -0.468356 |
|      |             | H | 1 | 0.067494  | 3.266827  | 0.869452  |
|      |             | C | 6 | -1.962269 | 3.151630  | 0.118225  |
|      |             | H | 1 | -2.120886 | 2.131544  | 0.485639  |
|      |             | H | 1 | -2.463956 | 3.220127  | -0.857086 |

|  |             |   |   |           |           |           |
|--|-------------|---|---|-----------|-----------|-----------|
|  |             | C | 6 | -2.570264 | 4.171228  | 1.083939  |
|  |             | H | 1 | -3.644925 | 4.003808  | 1.205972  |
|  |             | H | 1 | -2.108372 | 4.103996  | 2.075522  |
|  |             | H | 1 | -2.432370 | 5.196393  | 0.721560  |
|  |             | O | 8 | -4.437108 | 1.783838  | 0.012350  |
|  |             | C | 6 | -3.501754 | 2.435057  | -0.272212 |
|  |             | N | 7 | -2.632639 | 3.214227  | -0.551975 |
|  |             | C | 6 | -1.278706 | 3.282101  | -0.886234 |
|  |             | C | 6 | -0.721590 | 4.539636  | -1.129039 |
|  |             | C | 6 | 0.625563  | 4.642972  | -1.462513 |
|  |             | C | 6 | 1.417668  | 3.500065  | -1.554676 |
|  |             | C | 6 | 0.853430  | 2.247799  | -1.311381 |
|  |             | C | 6 | -0.491826 | 2.127885  | -0.977625 |
|  |             | H | 1 | -1.349292 | 5.420274  | -1.053425 |
|  |             | H | 1 | 1.054950  | 5.621623  | -1.649945 |
|  |             | H | 1 | 2.467631  | 3.583732  | -1.813990 |
|  |             | H | 1 | 1.464003  | 1.353064  | -1.379042 |
|  |             | H | 1 | -0.930822 | 1.153344  | -0.786082 |
|  |             | O | 8 | 0.391677  | -2.082698 | 3.786978  |
|  |             | C | 6 | 0.800447  | -2.079311 | 2.690520  |
|  |             | N | 7 | 1.088839  | -2.041278 | 1.517737  |
|  |             | C | 6 | 2.231914  | -2.245636 | 0.726194  |
|  |             | C | 6 | 2.103385  | -2.130895 | -0.659476 |
|  | -992.438199 | C | 6 | 3.218595  | -2.327281 | -1.469403 |
|  | -992.413124 | C | 6 | 4.455209  | -2.636632 | -0.906943 |
|  | -992.502762 | C | 6 | 4.574600  | -2.749597 | 0.478062  |
|  |             | C | 6 | 3.469542  | -2.555554 | 1.299666  |
|  |             | H | 1 | 1.135261  | -1.890237 | -1.083962 |
|  |             | H | 1 | 3.115487  | -2.238182 | -2.545751 |
|  |             | H | 1 | 5.321030  | -2.789128 | -1.542107 |
|  |             | H | 1 | 5.533545  | -2.989896 | 0.925198  |
|  |             | H | 1 | 3.558612  | -2.641181 | 2.377565  |
|  |             | O | 8 | -1.174078 | -1.155792 | -0.396124 |
|  |             | H | 1 | -0.613106 | -1.304880 | 0.377353  |
|  |             | C | 6 | -2.242474 | -2.100698 | -0.349310 |
|  |             | H | 1 | -1.845475 | -3.126950 | -0.315215 |
|  |             | H | 1 | -2.778731 | -1.992745 | -1.299094 |
|  |             | C | 6 | -3.194944 | -1.867513 | 0.820963  |
|  |             | H | 1 | -2.630838 | -1.946090 | 1.760768  |
|  |             | H | 1 | -3.574896 | -0.840730 | 0.764779  |
|  |             | C | 6 | -4.357982 | -2.862070 | 0.831375  |
|  |             | H | 1 | -3.999834 | -3.895371 | 0.907197  |
|  |             | H | 1 | -5.025850 | -2.678949 | 1.678997  |
|  |             | H | 1 | -4.954900 | -2.784175 | -0.084663 |
|  |             | O | 8 | 1.800883  | 2.479486  | -0.576778 |
|  |             | C | 6 | 1.223837  | 1.424916  | -0.628839 |
|  | -992.409529 | N | 7 | 1.441929  | 0.147453  | -0.523290 |
|  | -992.387698 | C | 6 | 2.747501  | -0.295599 | -0.223799 |
|  | -992.462996 | C | 6 | 3.196503  | -1.474482 | -0.835284 |
|  |             | C | 6 | 4.458271  | -1.987506 | -0.550870 |
|  |             | C | 6 | 5.296936  | -1.336370 | 0.351972  |
|  |             | C | 6 | 4.856674  | -0.165135 | 0.967522  |

|      |             |   |   |           |           |           |
|------|-------------|---|---|-----------|-----------|-----------|
|      |             | C | 6 | 3.595584  | 0.352533  | 0.688349  |
|      |             | H | 1 | 2.545209  | -1.975776 | -1.542547 |
|      |             | H | 1 | 4.786685  | -2.899406 | -1.040019 |
|      |             | H | 1 | 6.281118  | -1.735775 | 0.573511  |
|      |             | H | 1 | 5.499282  | 0.351539  | 1.674046  |
|      |             | H | 1 | 3.263161  | 1.263763  | 1.170609  |
|      |             | O | 8 | 0.507714  | -2.252191 | 0.435686  |
|      |             | C | 6 | -0.169337 | -1.386407 | 0.047693  |
|      |             | N | 7 | -1.162194 | -0.699709 | -0.282409 |
|      |             | C | 6 | -2.501593 | -1.170224 | -0.120992 |
|      |             | C | 6 | -3.510470 | -0.461528 | -0.776607 |
|      |             | C | 6 | -4.836211 | -0.864961 | -0.646951 |
|      |             | C | 6 | -5.162951 | -1.971819 | 0.133438  |
|      |             | C | 6 | -4.151823 | -2.675126 | 0.786126  |
|      |             | C | 6 | -2.822887 | -2.280390 | 0.664873  |
|      |             | H | 1 | -3.252566 | 0.391496  | -1.394660 |
|      |             | H | 1 | -5.613999 | -0.310237 | -1.161202 |
|      |             | H | 1 | -6.196665 | -2.284471 | 0.232850  |
|      |             | H | 1 | -4.394807 | -3.537656 | 1.397865  |
|      |             | H | 1 | -2.044861 | -2.829440 | 1.183422  |
|      |             | O | 8 | -0.285052 | 1.558813  | -1.005286 |
|      |             | H | 1 | -0.768526 | 0.653872  | -0.735395 |
|      |             | C | 6 | -0.974424 | 2.781784  | -0.608858 |
|      |             | H | 1 | -1.868839 | 2.822283  | -1.235914 |
|      |             | H | 1 | -0.303816 | 3.592476  | -0.894325 |
|      |             | C | 6 | -1.308820 | 2.816873  | 0.874163  |
|      |             | H | 1 | -1.934259 | 1.954382  | 1.130986  |
|      |             | H | 1 | -0.382189 | 2.732202  | 1.452487  |
|      |             | C | 6 | -2.035921 | 4.114574  | 1.237828  |
|      |             | H | 1 | -2.977163 | 4.212447  | 0.685667  |
|      |             | H | 1 | -2.271119 | 4.137164  | 2.305835  |
|      |             | H | 1 | -1.420406 | 4.991964  | 1.011257  |
|      |             | O | 8 | 2.228103  | 1.763689  | -0.307734 |
|      |             | C | 6 | 1.144218  | 1.231560  | -0.282325 |
|      |             | N | 7 | 0.984737  | -0.146208 | -0.118320 |
|      |             | C | 6 | 2.232180  | -0.879221 | -0.004330 |
|      |             | C | 6 | 2.864848  | -1.341202 | -1.153498 |
|      |             | C | 6 | 4.065600  | -2.038025 | -1.043497 |
|      |             | C | 6 | 4.627160  | -2.269646 | 0.211099  |
|      |             | C | 6 | 3.986429  | -1.802078 | 1.357326  |
|      |             | C | 6 | 2.785792  | -1.104369 | 1.251501  |
|      | -992.486409 | H | 1 | 2.417183  | -1.154620 | -2.123678 |
| I_IM | -992.464982 | H | 1 | 4.560904  | -2.399731 | -1.938444 |
|      | -992.539291 | H | 1 | 5.562496  | -2.813034 | 0.295411  |
|      |             | H | 1 | 4.420296  | -1.979337 | 2.335832  |
|      |             | H | 1 | 2.277986  | -0.734753 | 2.135747  |
|      |             | O | 8 | -0.040334 | -2.170937 | 0.079321  |
|      |             | C | 6 | -0.188489 | -0.969837 | -0.046022 |
|      |             | N | 7 | -1.388769 | -0.334636 | -0.117733 |
|      |             | C | 6 | -2.674087 | -0.906359 | -0.064616 |
|      |             | C | 6 | -3.755220 | -0.020244 | -0.188905 |
|      |             | C | 6 | -5.061734 | -0.488936 | -0.144458 |

|      |             |   |   |           |           |           |
|------|-------------|---|---|-----------|-----------|-----------|
|      |             | C | 6 | -5.317453 | -1.849147 | 0.024298  |
|      |             | C | 6 | -4.244653 | -2.727724 | 0.147419  |
|      |             | C | 6 | -2.927837 | -2.273631 | 0.105226  |
|      |             | H | 1 | -3.562509 | 1.040642  | -0.321679 |
|      |             | H | 1 | -5.882110 | 0.214755  | -0.242727 |
|      |             | H | 1 | -6.337318 | -2.216598 | 0.058926  |
|      |             | H | 1 | -4.426251 | -3.789789 | 0.279837  |
|      |             | H | 1 | -2.102829 | -2.961800 | 0.202102  |
|      |             | O | 8 | -0.019758 | 1.894119  | -0.418039 |
|      |             | H | 1 | -1.357019 | 0.669501  | -0.228508 |
|      |             | C | 6 | 0.059446  | 3.338665  | -0.570451 |
|      |             | H | 1 | -0.846828 | 3.596660  | -1.123473 |
|      |             | H | 1 | 0.933238  | 3.572753  | -1.180954 |
|      |             | C | 6 | 0.108737  | 4.041883  | 0.777371  |
|      |             | H | 1 | -0.756461 | 3.730750  | 1.374375  |
|      |             | H | 1 | 1.007849  | 3.721726  | 1.314153  |
|      |             | C | 6 | 0.113039  | 5.563106  | 0.607291  |
|      |             | H | 1 | -0.785099 | 5.909435  | 0.083528  |
|      |             | H | 1 | 0.143742  | 6.060503  | 1.581252  |
|      |             | H | 1 | 0.984997  | 5.897293  | 0.034263  |
|      |             | O | 8 | 3.072611  | -0.195232 | 0.025770  |
|      |             | C | 6 | 1.904062  | -0.456218 | 0.125630  |
|      |             | N | 7 | 0.850953  | 0.504286  | -0.084716 |
|      |             | C | 6 | 1.267191  | 1.887619  | -0.182899 |
|      |             | C | 6 | 1.800858  | 2.536749  | 0.929002  |
|      |             | C | 6 | 2.149996  | 3.879957  | 0.827775  |
|      |             | C | 6 | 1.965584  | 4.565568  | -0.372608 |
|      |             | C | 6 | 1.428860  | 3.906872  | -1.476408 |
|      |             | C | 6 | 1.076177  | 2.562272  | -1.384539 |
|      |             | H | 1 | 1.934211  | 1.997841  | 1.859524  |
|      |             | H | 1 | 2.566749  | 4.391000  | 1.689026  |
|      |             | H | 1 | 2.240172  | 5.612481  | -0.446521 |
|      |             | H | 1 | 1.283627  | 4.436068  | -2.412019 |
|      |             | H | 1 | 0.659290  | 2.037769  | -2.237628 |
|      |             | O | 8 | -0.578035 | 0.466029  | 1.960723  |
|      | -992.414687 | C | 6 | -0.515221 | 0.282838  | 0.777203  |
| ITS2 | -992.393219 | N | 7 | -1.253971 | -0.053519 | -0.268837 |
|      | -992.467503 | C | 6 | -2.615153 | -0.380177 | -0.245236 |
|      |             | C | 6 | -3.214902 | -0.718841 | -1.467020 |
|      |             | C | 6 | -4.562666 | -1.053964 | -1.523064 |
|      |             | C | 6 | -5.337459 | -1.058384 | -0.363463 |
|      |             | C | 6 | -4.745027 | -0.722706 | 0.852870  |
|      |             | C | 6 | -3.396367 | -0.385061 | 0.921734  |
|      |             | H | 1 | -2.606678 | -0.713933 | -2.365669 |
|      |             | H | 1 | -5.009118 | -1.312932 | -2.478043 |
|      |             | H | 1 | -6.389277 | -1.320081 | -0.407374 |
|      |             | H | 1 | -5.337182 | -0.722110 | 1.762882  |
|      |             | H | 1 | -2.943205 | -0.124990 | 1.869790  |
|      |             | O | 8 | 1.361674  | -1.633943 | 0.404384  |
|      |             | H | 1 | -0.037102 | 0.146706  | -0.873828 |
|      |             | C | 6 | 2.274401  | -2.751900 | 0.594845  |
|      |             | H | 1 | 1.731630  | -3.426278 | 1.260581  |

|      |             |   |   |           |           |           |
|------|-------------|---|---|-----------|-----------|-----------|
|      |             | H | 1 | 3.169466  | -2.386306 | 1.102915  |
|      |             | C | 6 | 2.610627  | -3.423458 | -0.727982 |
|      |             | H | 1 | 1.678563  | -3.717359 | -1.223881 |
|      |             | H | 1 | 3.112883  | -2.700051 | -1.379470 |
|      |             | C | 6 | 3.505667  | -4.646774 | -0.515374 |
|      |             | H | 1 | 3.016880  | -5.393093 | 0.120870  |
|      |             | H | 1 | 3.739696  | -5.124820 | -1.471186 |
|      |             | H | 1 | 4.452864  | -4.369557 | -0.039510 |
|      |             | O | 8 | -3.077644 | 1.366905  | 0.083249  |
|      |             | C | 6 | -2.116017 | 0.705384  | -0.248361 |
|      |             | N | 7 | -0.844421 | 1.160522  | -0.467437 |
|      |             | C | 6 | -0.370551 | 2.481537  | -0.421393 |
|      |             | C | 6 | -1.150060 | 3.573409  | -0.017274 |
|      |             | C | 6 | -0.589370 | 4.848622  | 0.000338  |
|      |             | C | 6 | 0.734753  | 5.061623  | -0.374737 |
|      |             | C | 6 | 1.507490  | 3.972598  | -0.775575 |
|      |             | C | 6 | 0.962944  | 2.694715  | -0.801291 |
|      |             | H | 1 | -2.177242 | 3.416212  | 0.275345  |
|      |             | H | 1 | -1.204802 | 5.685773  | 0.315034  |
|      |             | H | 1 | 1.158772  | 6.059710  | -0.355851 |
|      |             | H | 1 | 2.541414  | 4.114895  | -1.073409 |
|      |             | H | 1 | 1.566581  | 1.849884  | -1.118796 |
|      |             | O | 8 | -0.305197 | -3.009312 | -1.942649 |
|      |             | C | 6 | 0.396501  | -2.373962 | -1.253826 |
|      |             | N | 7 | 1.027289  | -1.631913 | -0.541165 |
|      |             | C | 6 | 2.282614  | -1.600970 | 0.081567  |
|      |             | C | 6 | 2.530349  | -0.595845 | 1.018857  |
|      | -992.472609 | C | 6 | 3.768652  | -0.533676 | 1.651604  |
| I_PC | -992.449448 | C | 6 | 4.759682  | -1.467070 | 1.355391  |
|      | -992.531445 | C | 6 | 4.506087  | -2.468999 | 0.418697  |
|      |             | C | 6 | 3.273473  | -2.541603 | -0.220882 |
|      |             | H | 1 | 1.750513  | 0.121327  | 1.247639  |
|      |             | H | 1 | 3.955213  | 0.248575  | 2.379765  |
|      |             | H | 1 | 5.723368  | -1.415548 | 1.850297  |
|      |             | H | 1 | 5.271780  | -3.200391 | 0.181949  |
|      |             | H | 1 | 3.072585  | -3.317202 | -0.952203 |
|      |             | O | 8 | -2.139818 | -0.629513 | -0.473298 |
|      |             | H | 1 | -0.174357 | 0.449998  | -0.734098 |
|      |             | C | 6 | -3.396697 | -1.302239 | -0.250002 |
|      |             | H | 1 | -3.374826 | -2.157597 | -0.930227 |
|      |             | H | 1 | -4.213097 | -0.636509 | -0.540178 |
|      |             | C | 6 | -3.542984 | -1.755329 | 1.196863  |
|      |             | H | 1 | -2.679838 | -2.376633 | 1.463504  |
|      |             | H | 1 | -3.521530 | -0.874543 | 1.848194  |
|      |             | C | 6 | -4.841616 | -2.535611 | 1.412595  |
|      |             | H | 1 | -4.879406 | -3.430538 | 0.780833  |
|      |             | H | 1 | -4.933474 | -2.859422 | 2.453876  |
|      |             | H | 1 | -5.718730 | -1.922933 | 1.175572  |
